# Supplementary material
Source: PubMed Central journal article supplement (PMC3276659)
Supplement: mmc1.pdf [file mmc1.pdf]

The American Journal of Human Genetics, Volume 90

Supplemental Data

## Mutations in *KAT6B*, Encoding a Histone

### Acetyltransferase, Cause Genitopatellar Syndrome

Philippe M. Campeau, Jaeseung C. Kim, James T. Lu, Jeremy A. Schwartzentruber, Omar A. Abdul-Rahman, Silke Schlaubitz, David M. Murdock, Ming-Ming Jiang, Edward J. Lammer, Gregory M. Enns, William J. Rhead, Jon Rowland, Stephen P. Robertson, Valérie Cormier-Daire, Matthew N. Bainbridge, Xiang-Jiao Yang, Marie-Claude Gingras, Richard A. Gibbs, David S. Rosenblatt, Jacek Majewski, and Brendan H. Lee

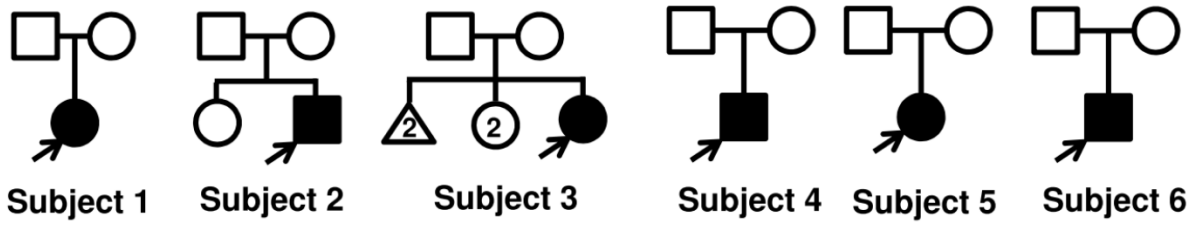

Figure S1. Pedigrees

Pedigrees of the families included in this study.

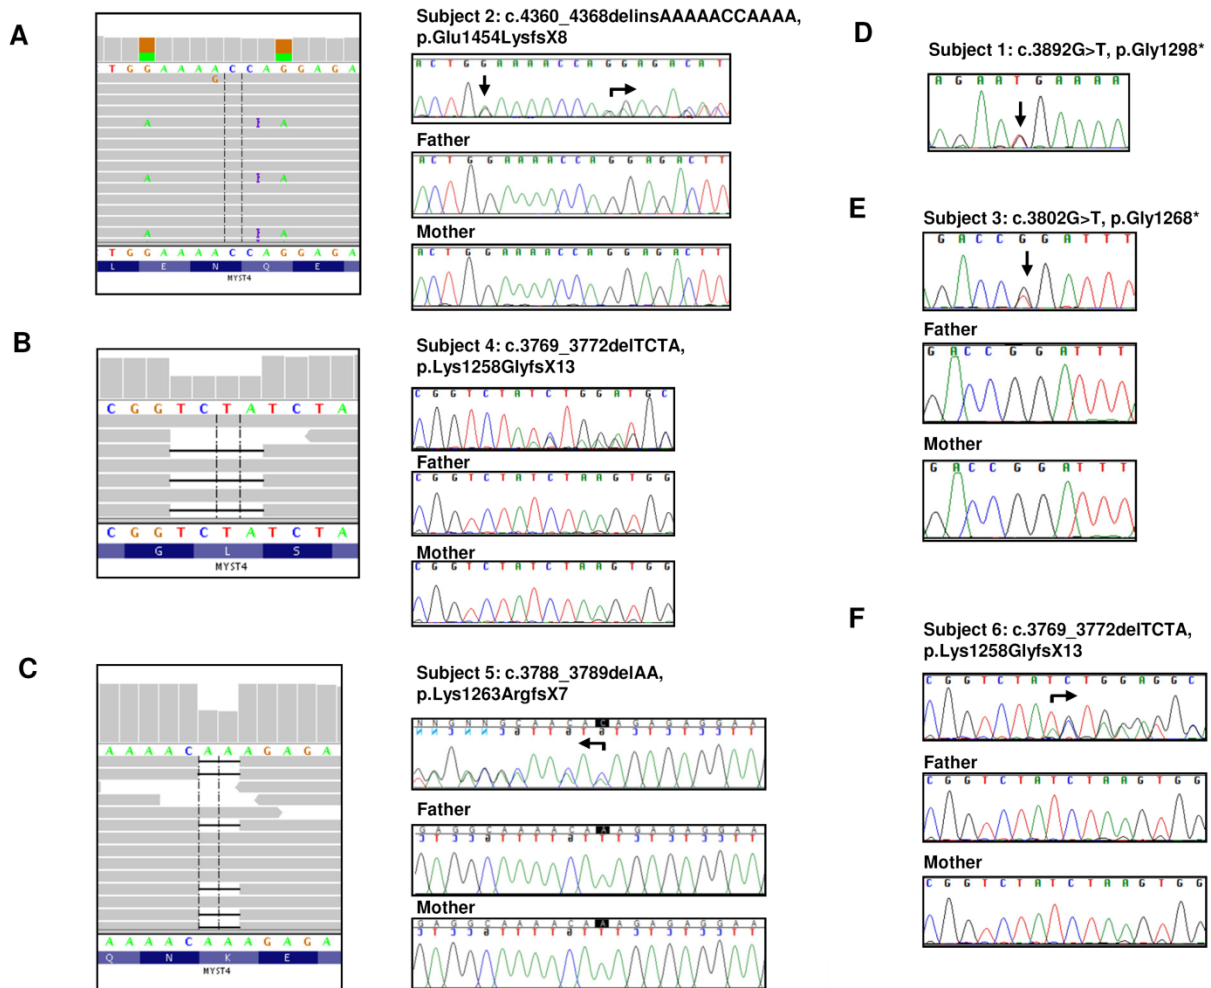

Figure S2. Confirmation of Mutations

*KAT6B* mutations by exome sequencing in subjects 2 (A), 4 (B), and 5 (C). Confirmations by Sanger sequencing for these three and subjects 1 (D), 3 (E) and 6 (F). Sanger sequencing confirmed all mutations detected by exome sequencing, and in all cases where parental samples were available, the parents did not carry the mutation.

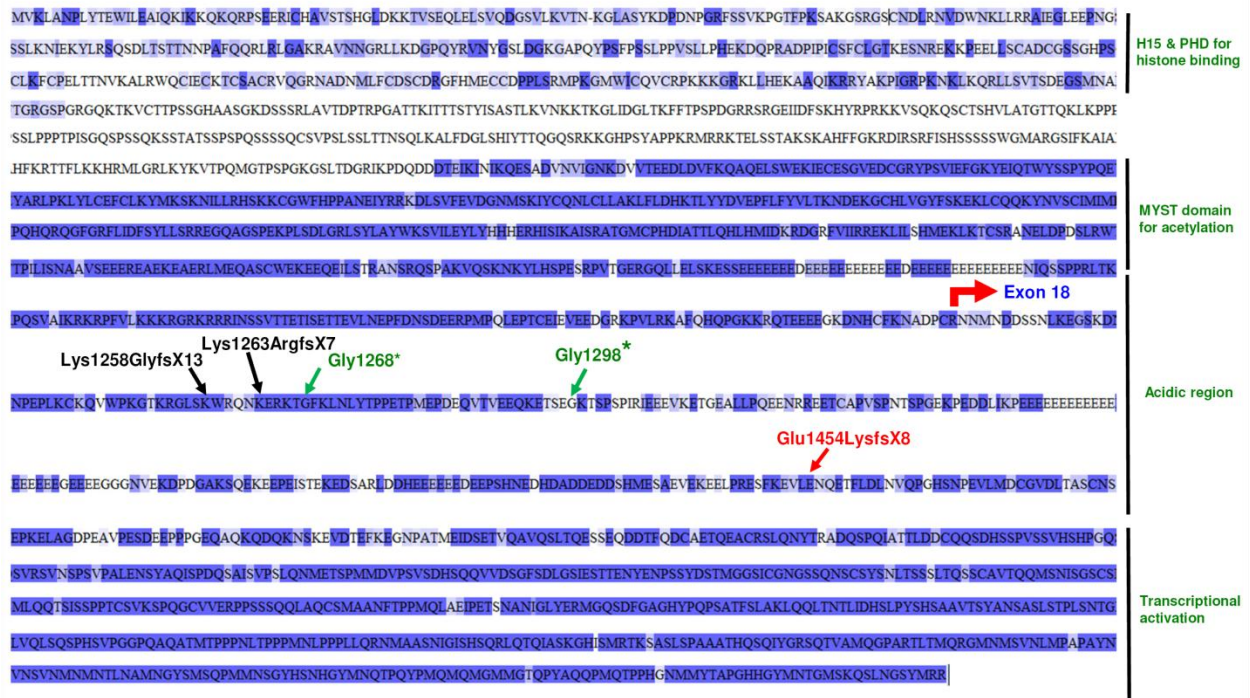

Figure S3. KAT6B Sequence Conservation

The amino acid sequence of human KAT6B (Uniprot Q8WYB5) is shown along with conservation information. The homologues from *Mus musculus* (Q8BRB7), *Bos taurus* (F1MF5), *Macaca fascicularis* (Q8WML3) and *Canis familiaris* (F1PWC5) were aligned to the human protein using JalView. Perfectly conserved residues are shown in dark blue. The mouse isoform in Uniprot does not contain amino acids corresponding to human amino acids 482-668, and the *Bos taurus* and *Macaca fascicularis* isoforms do not contain amino acids corresponding to human amino acids 373-668, which explains the large region between the PHD and MYST domains without conservation. The mutation locations are illustrated with arrows as in Figure 3.

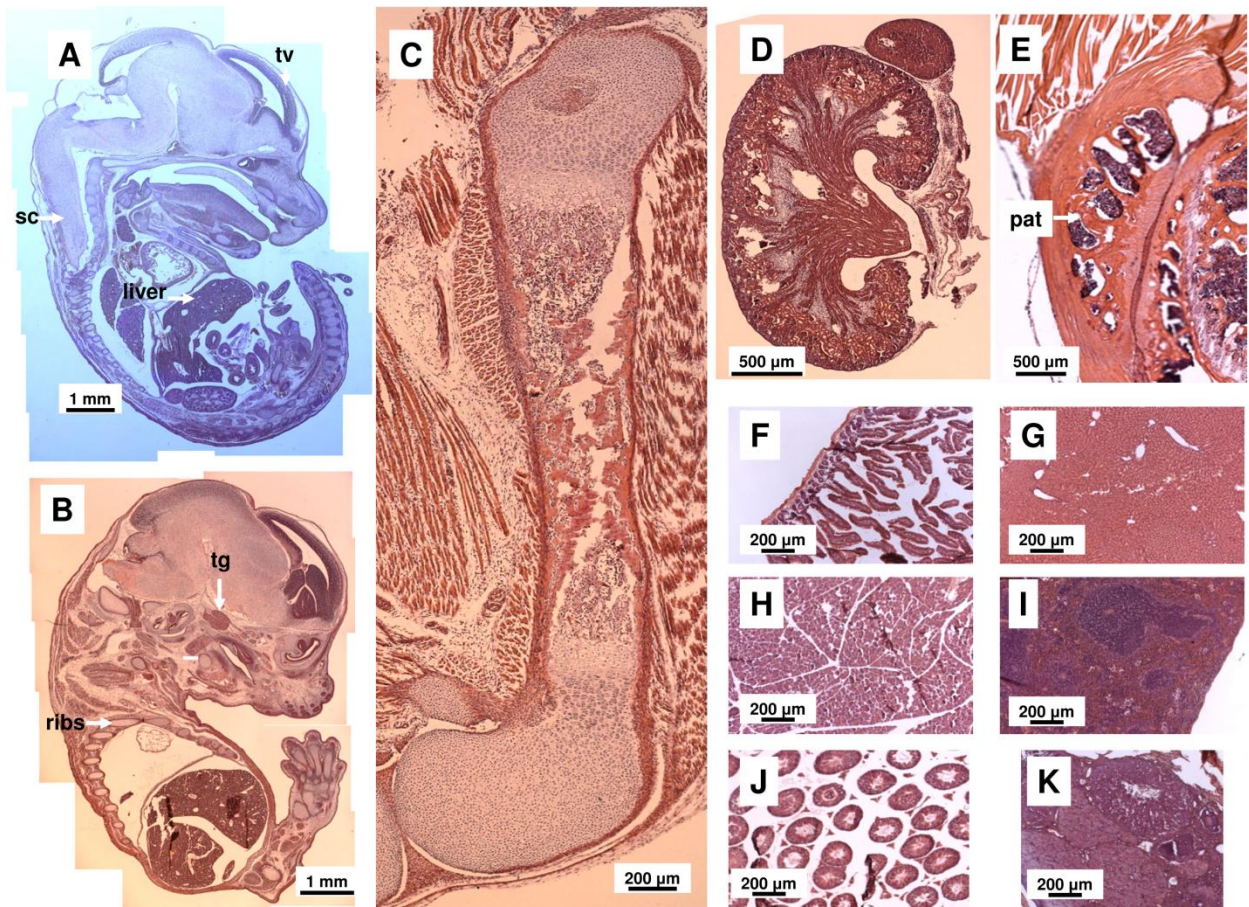

Figure S4. Tissues Corresponding to Figure 5

Haematoxylin and eosin staining of tissues corresponding to the tissues shown in Fig. 5. Tissues shown are: (A and B) whole embryos at E15.5, (C) femur at P1, and (D) kidney at P1. The other tissues are at 8 weeks of age: (E) patella, (F) duodenum, (G) liver, (H) pancreas, (I) spleen, (J) testis, and (K) ovary.

Table S1. Primers Used in This Study

| Purpose of primer      | Primer name            | Sequence                    |
|------------------------|------------------------|-----------------------------|
| Genomic DNA sequencing | hMYST4ex3_1F           | AGTTCTGTAAATACAAAGAGAACCTC  |
|                        | hMYST4ex3_1R           | TCGGCTCCTCAAGTCCTTC         |
|                        | hMYST4ex3_2F           | TTTCCTAAGTCAGCCAAGGG        |
|                        | hMYST4ex3_2R           | CCACATAAACTTAAGTGAAACCG     |
|                        | hMYST4ex4F             | ctgcactacaacctggcg          |
|                        | hMYST4ex4R             | AGCATGAAGCTATGATAATGGG      |
|                        | hMYST4ex5-6F           | CATTGGCTAGCCTCATCAGC        |
|                        | hMYST4ex5-6R           | GAACCTGTATACCTCTGAGCTGTC    |
|                        | hMYST4ex7F             | TACAGGCATCCTTGAGCAGC        |
|                        | hMYST4ex7R             | AAACCCCTAAAGGAATCTGAGAG     |
|                        | hMYST4ex8_1F           | TGCCTTTCCAACAGAGAAAC        |
|                        | hMYST4ex8_1R           | ACTGCACTGGCTGGAAGAAC        |
|                        | hMYST4ex8_2F           | TCCACCTTCTTCACTTCCAC        |
|                        | hMYST4ex8_2R           | TTCAGGGTTGGGGAGAAAG         |
|                        | hMYST4ex9F             | TCCCTATTTGCCAGTATGC         |
|                        | hMYST4ex9R             | AAGGGATTCTCTATAAAATCAACACAG |
|                        | hMYST4ex10F            | GGTGAAGAACC AAAATGTAAGTG    |
|                        | hMYST4ex10R            | AAAATCATCCCTAATTCCTGC       |
|                        | hMYST4ex11F            | AAATTGAACAATATTTAATCTTCCCC  |
|                        | hMYST4ex11R            | TCAGCACATAGTCAACAATTAGG     |
|                        | hMYST4ex12F            | GAAGAAACAATTTTATATGGTGCAG   |
|                        | hMYST4ex12R            | CCTGTTCAAAGAATTGGGCTC       |
|                        | hMYST4ex13F            | TACAAGGACAGTGGCAGGTG        |
|                        | hMYST4ex13R            | CTGTAACGGCCATCAGCTTC        |
|                        | hMYST4ex14F            | GGCTCCTGTTCTAAGCTCTGG       |
|                        | hMYST4ex14R            | ATCTCCAGGGACCCTTTCTG        |
| hMYST4ex15F            | CATTAGTGCTAGCATATGTCCG |                             |

|                                   |                    |                                            |
|-----------------------------------|--------------------|--------------------------------------------|
|                                   | hMYST4ex15R        | AAGCTTTTGACAACGATCTTAATG                   |
|                                   | hMYST4ex16F        | GAGGCTCTGGCTGTGTAACCTG                     |
|                                   | hMYST4ex16R        | AATAGACAGAATGTCTGCAATGAC                   |
|                                   | hMYST4ex17F        | TGTCTACTGCATATCGACTCAACC                   |
|                                   | hMYST4ex17R        | CTCTTTGGCACCCAGTCAG                        |
|                                   | hMYST4ex18_1F      | TCAAGTTGCCCATGGTTATG                       |
|                                   | hMYST4ex18_1R      | TTGGCTTTTAGCACCATCTG                       |
|                                   | hMYST4ex18_2F      | TCATCAAACCTgaggaagagg                      |
|                                   | hMYST4ex18_2R      | CCTTGCTGTTCTTTTGGTCC                       |
|                                   | hMYST4ex18_3F      | TTGTAACAGTGAGCCCAAGG                       |
|                                   | hMYST4ex18_3R      | CCACTGTCTACGACTTGCTGTG                     |
|                                   | hMYST4ex18_4F      | TCAAAGTGCCATCTCAGTGC                       |
|                                   | hMYST4ex18_4R      | CCCCAAAATCACTCTGACCC                       |
|                                   | hMYST4ex18_5F      | CATGGCTGCTAACTTCACCC                       |
|                                   | hMYST4ex18_5R      | AGCGCCCATAGATTTGTGAC                       |
|                                   | hMYST4ex18_6F      | ACAGCCAAAGACTGCAAACC                       |
|                                   | hMYST4ex18_6R      | TTTGTGCAGATCAATCCAATAG                     |
| cDNA amplification and sequencing | hMYST4 cDNA seq F  | GACGAAACCACAGTCAGTTGCCATAA                 |
|                                   | hMYST4 cDNA seq R  | CACCTGGTGATGTGTTTGGACTTA                   |
| RT-PCR                            | hMYST RT primer F  | AATCCAATAGTGATGCCCCG                       |
|                                   | hMYST RT primer R  | TCACGGCTACATGAACACAG                       |
|                                   | hMYST probe        | 5'FAM/ACTGCCAC/ZEN/GTTGTCTACCTTCTC/3'IBFQ  |
|                                   | hGAPDH RT primer F | CTTCAACAGCGACACCCA                         |
|                                   | hGAPDH RT primer R | ATGAGGTCCACCACCCT                          |
|                                   | hGAPDH probe       | 5'FAM/CATTGCCCT/ZEN/CAACGACCACTTTGT/3'IBFQ |
